1 Comparative analysis of the effect of genomic isolators flanking transgenes to  
2 avoid positional effects in Arabidopsis

3

4 Ana Pérez-González and Elena Caro\*

5

6

7

8 Centre for Plant Biotechnology and Genomics

9 Universidad Politécnica de Madrid (UPM) - Instituto Nacional de Investigación y  
10 Tecnología Agraria y Alimentaria (INIA)

11 Campus Montegancedo UPM

12 Pozuelo de Alarcón (Madrid), Spain

13

14

15 [ana.perez@upm.es](mailto:ana.perez@upm.es)

16

17 \*Corresponding author

18 [elena.caro@upm.es](mailto:elena.caro@upm.es)

19 [0034 3364568](tel:00343364568)

20

21

22 Submission: August 3<sup>rd</sup> 2018

23 Number of figures: 5 (4 main figures + 1 supplementary figure)

24 Number of tables: 2

25 Word count: 4011

26

27

28

29

30

31 **Title**

32 Comparative analysis of the effect of genomic isolators flanking transgenes to  
33 avoid positional effects in Arabidopsis

34

35 **Running title**

36 Genomic insulators and transgene expression in Arabidopsis

37

38 **Highlight**

39 We have studied the effect of different insulator sequences over transgene  
40 expression levels and variability, and over transgene integration, using NGS.  
41 Our results compare the benefits obtained by their use.

42

43 **Abstract**

44 For more than 20 years, plant biologists have tried to achieve complete control  
45 of transgene expression, but until gene targeting techniques become routine,  
46 flanking transgenes with genetic insulators can help avoid positional effects.  
47 Insulators are DNA sequences with barrier activity that protect transgenes from  
48 interferences with the host genome. We have, for the first time, compared the  
49 effect of three insulator sequences previously described in the literature and of  
50 a matrix attachment region from Arabidopsis never tested before. Our results  
51 indicate that the use of all sequences increases transgene expression, but only  
52 the last one reduces variability between lines and between individuals to a  
53 minimum. We have analyzed the integration of insulator-flanked T-DNAs using  
54 whole genome re-sequencing (to our knowledge, also the first time) and found  
55 chiMAR lines with insertions located within heterochromatic regions of the  
56 genome, characterized by DNA methylation that did not spread into the T-DNA,  
57 suggesting that chiMAR can shelter transgene insertions from neighboring  
58 repressive epigenetic states. Finally, we could also observe a loss of accuracy  
59 of the RB insertion in the lines harboring insulators, evidenced by a high  
60 frequency of truncation of T-DNAs and of insertion of vector backbone that,  
61 however, did not affect transgene expression.

62

63 **Keywords**

64 Genetic insulators, MARs, enhancer-blocking, transgene expression, construct  
65 design, Arabidopsis, silencing.

66

67 **Abbreviations**

68 MAR: matrix attachment region

69 pNOS: nopaline synthase Agrobacterium gene promoter

70 TBS: transformation boost sequence

71 pMAS: mannopine synthase Agrobacterium gene promoter

72 S/MAR: scaffold/matrix attachment region

73 WGR: whole genome re-sequencing

74

75

76

77

78

79

80

81

82

83

84

85

86

87

88

89

90

91

92

93

94

95

96

## 97 **Introduction**

98 Due to the random nature of transgene insertion in the majority of higher  
99 eukaryotes, transgenic DNA may integrate into regions of the genome that are  
100 transcriptionally repressed (heterochromatin), which can result in many cases in  
101 transgene silencing. Additionally, transgenes may be incorporated near  
102 endogenous regulatory elements, such as transcriptional enhancers or  
103 repressors, which can cause their miss-expression (reviewed by Pérez-  
104 González & Caro 2016).

105 Chromatin insulator sequences, or boundary elements, are DNA sequences  
106 with the capacity to define a chromatin domain because of two key activities,  
107 the first is the ability to interfere with enhancer-promoter communication when  
108 placed between the two (enhancer blocking activity) and the second one is the  
109 ability to protect a flanked transgene from position-dependent silencing (barrier  
110 activity) (Matzat and Lei, 2014).

111 These barrier elements have been characterized extensively in animals. In  
112 plants, possibly the best studied elements with potential applications are  
113 scaffold or matrix attachment regions (S/MARs), which have been suggested to  
114 trigger the formation of chromatin loops, and thus delimit the boundaries of  
115 discrete chromosomal domains (Butaye et al., 2004). Much of the research  
116 carried out concerning the use of transgene-flanking MARs as genetic  
117 insulators has shown that the use of these elements results in an increase in  
118 the level of transgene expression and/or a reduction in plant-to-plant variability  
119 (Butaye et al., 2005). However, in some cases, reports of success using this  
120 technique have been followed by negative results (De Bolle *et al.*, 2003, De  
121 Bolle *et al.*, 2007).

122 One of the most studied MARs is the one localized upstream the chicken  
123 lysozyme gene (chiMAR) (Loc and Strätling, 1988). Its role as insulator was  
124 shown in studies with animal cell lines where its presence near a reporter gene  
125 produced an increase in transgene expression and a decrease in variability  
126 among different lines (Stief et al., 1989). The use of the chiMAR in plant  
127 constructs has been somehow controversial, leading to reports with different

128 conclusions. Mlynarova *et al.*, 1994 showed that the chicken sequence was  
129 able to bind to the tobacco nuclear matrix and that when it flanked a T-DNA  
130 containing a GUS reporter gene, the variability of its expression decreased in  
131 full-grown primary transformants of tobacco. The same group later found that a  
132 significant reduction in variation of gene expression was conferred upon the  
133 GUS gene driven by the double cauliflower mosaic virus 35s promoter, but not  
134 to the NPTII gene, driven by the nopaline synthase (pNOS) promoter  
135 (Mlynarova *et al.*, 1995). These results could, however, not be replicated in  
136 *Arabidopsis thaliana* first generation plants, where the chiMAR was found to  
137 have no influence on the level or variability of expression of transgenes driven  
138 by the 35S promoter (De Bolle *et al.*, 2003). In fact, later studies applying  
139 different transformation methods and plant species reported no boost effect on  
140 transgene expression of wild type plants (De Bolle *et al.*, 2007), but an increase  
141 in silencing mutant backgrounds (Butaye *et al.*, 2004).

142 Allen *et al.*, 1996 showed that stably transformed cell lines in which a GUS  
143 reporter gene was flanked by the tobacco MAR isolated from a genomic clone  
144 containing a root specific gene (Rb7) (Hall *et al.*, 1991) produced more than 140  
145 times more GUS enzyme activity than control transformants without it. However,  
146 the use of Rb7 did not reduce variation between different transformants.

147 The effect of the Rb7 MAR increasing transgene expression was also reported  
148 by Mankin *et al.*, 2003, that analyzed in depth the specificity of the results  
149 depending on the promoter used. They reported that highly active promoters  
150 exhibited significant increases in GUS activity in constructs flanked by Rb7  
151 compared to controls, but its presence did not significantly increase GUS  
152 activity when driven by weak promoters. Importantly, most transgenes flanked  
153 by the insulator showed a large reduction in the number of low expressing GUS  
154 transformants, suggesting that MARs can reduce the frequency of gene  
155 silencing.

156 Following that line, Abranches *et al.*, 2005 tested the effects of Rb7 in  
157 conjunction with regulated transcription using a doxycycline-inducible luciferase  
158 transgene. The Rb7 lines showed higher reporter gene expression levels and

159 avoided silencing apparition in the absence of active transcription from  
160 condensed chromatin spreading.

161 Another well characterized genetic insulator, defined initially by its ability to  
162 block interactions between enhancers and promoters when positioned between  
163 them, is the petunia transformation boost sequence (TBS) (Hily et al., 2009).  
164 This sequence has been shown to function in Arabidopsis and tobacco, and a  
165 detailed analysis of the motifs it contains showed that several specific regions  
166 are required for maximum enhancer-blocking function (Singer et al., 2011).

167 It was only a few years ago that another work showed that the TBS could  
168 similarly function in synthetic constructs sheltering transgenes promoters from  
169 the host plant genome regulatory elements. The TBS sequence was found to  
170 produce enhanced transgene expression, but did not prevent gene silencing in  
171 transformants with multiple and rearranged gene copies (Dietz-Pfeilstetter et al.,  
172 2016).

173 Almost 25 years after the description of some of these DNA sequences, their  
174 use is still not common practice in plant engineering projects due to their big  
175 size that makes troublesome cloning them through traditional methods, and  
176 because the reports on their effect are scattered over different organisms and  
177 transformation methods with no comparisons to allow for comparison between  
178 them.

179

180 Targeting transgenes to a specific integration site in the plant genome might  
181 rule out chromosomal position effects, but until there are routine efficient  
182 techniques for plant directed gene targeting, another alternative method needs  
183 to be developed.

184

185 With the advent of modular cloning techniques that allow rapid and straight  
186 forward generation of multigene constructs, the incorporation of genetic  
187 insulators to the flanks of T-DNAs is no longer a problem. Therefore, we  
188 decided to perform a systematic and parallel study comparing the activity and  
189 effectivity of incorporating different boundary elements flanking transgenes as a  
190 strategy in T-DNA design to maximize and stabilize transgene expression. We

191 have, moreover, used whole genome re-sequencing for the molecular  
192 characterization of the insertion of insulator-flanked T-DNAs, finding interesting  
193 results that point to previously unknown functions of the barrier sequences.

## 194 **Material and Methods**

195

### 196 *Modular cloning*

197 Modular pieces AtS/MAR10 and Rb7 were amplified by PCR using Phusion  
198 High-Fidelity DNA Polymerase (NEB) from *A. thaliana* and *N. tabacum* genomic  
199 DNA using primers 359/348 and 269/270, respectively; chiMARs and TBS were  
200 amplified using KAPA2G Fast HotStart DNA Polymerase (Sigma) from chicken  
201 liver tissue and *P. hybrida* genomic DNA using primers 1724/1725/1726/1727  
202 and 275/276/277/278, respectively.

203

|      |                                                     |
|------|-----------------------------------------------------|
| 1724 | GCGCCGTCTCGCTCGGGAGGCTCAGAAAACGGCAGTTGG             |
| 1725 | GCGCCGTCTCGACCGCTCTAGGAAATTTAAGG                    |
| 1726 | GCGCCGTCTCGCGGTGCTCAGTAAGGCGGGT                     |
| 1727 | GCGCCGTCTCGCTCGAGCGCACACCAGAGCCTACACCTG             |
| 275  | GCGCCGTCTCGCTCGGGAGTTCCTAACACCTGGAGAACC             |
| 276  | GCGCCGTCTCGGCGACCAAAGTGTGCAGGCT                     |
| 277  | GCGCCGTCTCGTCGCCCCTTGGCTGTGAAAA                     |
| 278  | GCGCCGTCTCGCTCGAGCGAAGTTGTAATGAGTTGCTGGC            |
| 359  | GCGCCGTCTCGCTCGGGAGTGGCTATTGTTGTTATCATCA            |
| 348  | GCGCCGTCTCGCTCAAGCGGGGTTTAGCCATTAACATCGT            |
| 269  | GCGCCGTCTCGCTCGGGAGTCGATTA AAAATCCCAATTATATTT<br>GG |
| 270  | GCGCCGTCTCGCTCGAGCGACTATTTTCAGAAGAAGTTCCCAA         |

204

205 Modular pieces were cloned into pFranki (chiMARs and TBS) or into  
206 GoldenBraid pUPD2 (Rb7 and AtS/MAR10) vectors, as described in (Sarrion-  
207 Perdigones et al., 2011). pFranki is a home-made vector adapted to clone  
208 pieces originally designed for GB2.0 so they can be compatible with GB3.0 and  
209 MoClo cloning systems. pFranki vector is composed by the cloning cassette of  
210 the GoldenBraid pUPD vector and the backbone of the pUPD2 vector. To

211 generate transcriptional units, MoClo Level1 destination vectors were used  
212 (pICH47732-L1P1, pICH47742-L1P2, pICH47751-L1P3, pICH47761-L1P4).  
213 Insulators modular pieces were cloned into L1P1 and L1P4 in all cases.  
214 Luciferase transcriptional unit was cloned into L1P2 vector using the following  
215 modular pieces: pICH85281 (pMAS), pICSL80001 (luciferase CDS), pICH41421  
216 (tNOS) (Engler et al., 2014). Bialaphos resistance cassette (pICSL70005) was  
217 cloned into L1P3. Level2 destination vector pAGM4673 (Weber et al., 2011)  
218 was used for multigene assembly, and a rule of 2:1 molar ratio of  
219 inserts:acceptor was applied for adding Level1 plasmids to the reaction. Level1  
220 and Level2 digestion/ligation reactions were performed in a thermocycler as  
221 follows: 20 seconds at 37°C, [3 minutes at 37°C, 4 minutes at 16°C] for 26  
222 cycles, 5 minutes at 50°C, 5 minutes at 80°C, hold 16°C (adapted from Weber  
223 et al. 2011). *E. coli* DH5 $\alpha$  quimiocompetent cells were transformed with the  
224 ligation products from either level and grown in LB medium containing X-Gal  
225 (20 $\mu$ g/mL) (Duchefa) and IPTG (1mM) (Anatrace), supplemented with ampicillin  
226 (100 $\mu$ g/mL) (Formedium) for GB pUPD and MoClo Level1, chloramphenicol  
227 (50 $\mu$ g/mL) (Formedium) for GB pUPD2, or kanamycin (50 $\mu$ g/mL) (IBIAN  
228 Technologies) for MoClo Level2. Sequencing (Macrogen) was done previously  
229 to plant transformation for correct sequence confirmation.

230

### 231 *Plant transformation*

232 Level 2 transformation plasmids were introduced into *Agrobacterium*  
233 *tumefaciens* LBA4404 quimiocompetent cells and plated in LB medium  
234 supplemented with Rifampicin (25 $\mu$ g/mL) (Sigma-Aldrich), Streptomycin  
235 (100 $\mu$ g/mL) (sigma-Aldrich) and Kanamycin (50 $\mu$ g/ml). A single transformant  
236 colony was grown in 200mL LB medium supplemented with the same antibiotics  
237 at 28°C under constant shaking to perform Col0 plant transformation (Clough  
238 and Bent, 1998).

239

### 240 *Plant growth conditions and selection*

241 T1 seeds were put into soil and grown in an environment controlled room  
242 (FitoClima HP, Aralab) under 16/8 hours light/dark conditions, at 22°C and 65%



243 RH. After 10-20 days, seedlings were sprayed with Basta herbicide (200mg/L).  
244 Resistant plants were grown in the same conditions for T2 seeds recovering.

245

246 Seedlings were grown in plates in MS medium (Murashige and Skoog, 1962)  
247 with 1% sucrose, supplemented with 6 $\mu$ g/mL of DL-Phosphinothricin (Basta)  
248 herbicide (DL-Phosphinothricin, Sigma-Aldrich) for selection when needed, in a  
249 growth chamber under 16/8 hours light/dark conditions at 22°C.

250

#### 251 *Luciferase reporter assay*

252 For luciferase imaging, 16 seedlings per line were sowed in plates to analyze  
253 LUC activity. D-Luciferin Firefly, potassium salt (Biosynth) was dissolved in  
254 sterile H<sub>2</sub>O with 0.01% Triton X-100 to a final concentration of 0.2 $\mu$ M and  
255 sprayed over. After 6 minutes in the dark, luciferase activity was measured in a  
256 NightOWL II LB 983 (Berthold Technologies), with 3 minutes of exposition.

257

#### 258 *Whole Genome Re-sequencing*

259 Isolation of Arabidopsis genomic DNA was performed using a DNeasy Plant  
260 Mini Kit (Qiagen). Samples were sent to Novogene Co., Ltd. for library  
261 construction and sequencing. There, genomic DNA of each sample was  
262 randomly sheared into short fragments of about 350bp. These fragments were  
263 subjected to library construction using the Illumina TruSeq Library Construction  
264 Kit, strictly following manufacturer's instructions. As followed by end-repairing,  
265 dA-tailing and further ligation with Illumina adapters, the requirement fragments  
266 (between 300bp and 500bp) were selected by PCR and amplified. After gel  
267 electrophoresis and subsequent purification, the required fragments were  
268 obtained for library construction.

269

270 Quality control of the constructed libraries were performed afterwards. Qubit 2.0  
271 fluorometer (Life Technologies) was used to determine the concentration of the  
272 DNA libraries. After that, a dilution to 1 ng/ $\mu$ l was done and the Agilent 2100  
273 bioanalyzer was used to assess the insert size. Finally, a quantitative real-time  
274 PCR (qPCR) was performed to detect the effective concentration of each

275 library. Pair-end sequencing was performed on the Illumina platform, with the  
276 read length of 150bp at each end.

277

### 278 *Bisulfite conversion and sequencing*

279 Genomic DNA of 12 days-old plants of line chiMARs 6.13 was extracted using a  
280 DNeasy Plant Mini Kit (Qiagen). Bisulfite treatment was done using the EZ DNA  
281 Methylation Gold kit (Zymo Research) following the manufacturer's instructions.  
282 Amplification from converted DNA was performed with NXT Taq PCR kit  
283 (EURx) using primers 642 and 635. PCR fragments were checked on an 1%  
284 agarose gel for size verification. 4µl of PCR product was cloned into pGEM-T  
285 Easy (Promega) and transformed into chemically competent *E. coli* DH5α cells.  
286 Nine clones were selected for the analysis. Plasmid DNA of each clone was  
287 sent for sequencing (GATC), and results were checked using Geneious version  
288 10.2.2 software (Kearse et al., 2012). Comparison of the converted clones to  
289 the original unconverted sequences was done using CyMate software (Hetzl et  
290 al., 2007), to count the converted/unconverted cytosines at each site.  
291 Percentatge of methylation was calculated as (number of methylated C residues  
292 in each context (CG, CHG or CHH)/total number of C residues in that  
293 context)\*100.

294

|     |                       |
|-----|-----------------------|
| 642 | AATTTCCCGGACGTAGCGTA  |
| 635 | ATCCAAGCTTTCAAGCCACAC |

295

296

## 297 **Results**

298 Since the advent of plant genetic transformation, plant biologists have tried to  
299 maximize transgene expression level and minimize variability by flanking  
300 transgenes with genetic insulators. There are numerous studies that describe  
301 the use of a certain insulator sequence in a host organism and analyze different  
302 aspects of its barrier and enhancer-blocking ability, but they are performed in  
303 such diverse conditions that do not allow for comparison and their results are  
304 sometimes contradictory. Our work consists on the use four different insulator  
305 sequences flanking a LUC transgene with the aim of conducting a definitive

306 parallel and systematic analysis of their effect on transgene integration,  
307 expression level and variance in Arabidopsis.

308 Taking advantage of the capacities of modular cloning systems, we generated  
309 five identical constructs harboring the firefly luciferase transgene driven by the  
310 constitutive mannopine synthase *Agrobacterium* gene promoter (pMAS) and  
311 followed by the Basta resistance selection marker cassette. One of these  
312 constructs was used as a control, and the other four were flanked by different  
313 sequences reported in the literature to have some type of insulator activity  
314 (Figure 1A). The insulator sequences used in this work were the MAR located  
315 next to the tobacco root specific gene Rb7 (Rb7) (Hall et al., 1991), the chicken  
316 lysozyme A MAR region (chiMAR) (Loc and Strätling, 1988), the petunia  
317 transformation booster sequence (TBS) (Hily et al., 2009) and one of the  
318 scaffold/matrix attachment region sequences isolated from Arabidopsis  
319 chromosome 4 (AtS/MAR10) (Pascuzzi et al., 2014).

320 A time course study of the LUC expression conferred by the pMAS showed that  
321 its activity was maximum in young seedlings, and decreased rapidly as plants  
322 matured and formed the rosette (Figure 1B). Given these results, for the  
323 following experiments, LUC activity was always measured in 12 day old  
324 seedlings. Eight 3:1 segregating Arabidopsis Col0 T2 lines were randomly  
325 selected and a 100% Basta resistant T3 line coming from each of them was  
326 used for LUC activity imaging to assess their levels of transgene expression  
327 (Figure 1C). Our results confirmed previous reports, indicating that all  
328 constructs flanked by insulator elements led to plants with increased transgene  
329 expression (Figure 1D).

330 Another property of insulator sequences is their ability to decrease variability  
331 between transgenic lines transformed with the same construct. When the  
332 transgene was flanked by Rb7, chiMAR or TBS, the increase in LUC expression  
333 described above was accompanied also by a statistically significant increase in  
334 the coefficient of variation between lines, which measures the extent of variation  
335 in relation to the mean within a population (Figures 2A and B). Line 40.01 from  
336 AtS/MAR10 behaved very differently from the rest in terms of expression  
337 (Figure 1B). We confirmed it was an outlier (expression value above

338 Q3 + 1.5×InterQuartileRange) and thus, did not consider it for this analysis.  
339 When the outlier line data was removed, the presence of AtS/MAR10 flanking  
340 the transgene led to the opposite effect than the rest of insulators, a statistically  
341 significant reduction in the coefficient of variation between lines, or what is the  
342 same, a reduction in inter-line variation (Figures 2A and B).

343 To measure the level of variation between genetically identical individuals within  
344 a population, we measured the expression of 16 seedlings from each line, and  
345 analyzed the effect of insulators on inter-individual (intra-line) variation (Figure  
346 2C). For Rb7, chiMAR and TBS, the increase in expression induced was not  
347 homogeneous between individuals and, as a result, there was a greater  
348 variance in these lines compared to the control. For AtS/MAR10, there was a  
349 small variance, similar to that of the control with no insulator (CV around 25%)  
350 (Figure 2D).

351 Next, we compared LUC expression in segregating lines from the T2 generation  
352 with homozygous lines from the T3 generation, in an effort to establish if, in our  
353 system in study, LUC expression was dependent on gene dosage. Our  
354 experiments confirm an increase in expression in all T3 lines compared to T2,  
355 consistent with the establishment of homozygous populations. No differences  
356 could be observed due to the presence of insulators (Figure 2E).

357 In an effort to further characterize the insulators lines in more detail than  
358 previous works, we proceeded to perform whole genome re-sequencing (WGR)  
359 in some of the lines obtained by transformation with each construct (Figure 3A).  
360 The results allowed us to select 21 lines with a single T-DNA insertion locus.  
361 Even though all the lines showed a 3:1 Basta resistance segregation in the T2,  
362 we found three T3 lines in which there were multiple insertions in different  
363 chromosomes, suggesting that some of them were not expressing the  
364 transgenes properly. An interesting finding was that AtS/MAR10 40.01, the  
365 outlier line that showed abnormally high LUC expression, had two insertions  
366 very close to each other in chromosome 1, what could explain their behavior as  
367 a single locus in our segregation analysis and the increased transgene  
368 expression. The WGR data also allowed us to map the T-DNA insertion site of  
369 each line and to identify the deletions in the host genome associated with the

370 insertion (Figure 3B and Table 1). Surprisingly, integration was not  
371 homogeneous among all chromosomes (we found none of the mapped  
372 insertions to be located in chromosome 2), and for Rb7 lines there was a clear  
373 preference for insertion within chromosome 3 (60%, 3 out of 5 lines) and with  
374 the T-DNA in the 3'→5' direction (100%, 5 out of 5 lines), while for the rest of  
375 the lines chromosome 3 integrations and reverse T-DNA insertions only  
376 represented a 31% in each case (5 out of 16 for each) (Table 1).

377 The existence of a selection bias towards T-DNA integrations in euchromatin  
378 where the transgenes used for selection of transformants are expressed has  
379 been reported previously in the literature (Francis and Spiker, 2005). This was  
380 the case for most of the insertions we mapped (insertion sites in euchromatin,  
381 chromatin states 1 to 7 described in Sequeira-Mendes *et al.*, 2014, Figure 3C),  
382 and when we plotted LUC activity versus state of the chromatin at the T-DNA  
383 insertion site, we could observe that lines grouped high or low depending on the  
384 construct they belonged to, and not left or right depending on the chromatin  
385 state where the T-DNA integration was located (Figure 3C). However, 2 lines  
386 carrying the chiMAR insulator presented T-DNA insertions in regions of the host  
387 genome featuring “chromatin state 8”, described as an A/T rich heterochromatic  
388 region characterized by methylated DNA and chromatin modifications such as  
389 H3K9me2 and H3K27me1 (Sequeira-Mendes *et al.*, 2014).

390 We performed an analysis of the DNA methylation levels in the junction  
391 between the host genome and the T-DNA insertion for chiMAR line 6.13 and  
392 our results show that the DNA at the insertion site is indeed heavily methylated  
393 while the DNA of the T-DNA remains devoid of this chromatin modification even  
394 in the T3 generation, consistent with a boundary role of the insulator (Figure 4).

395 The data from WGR also allowed us to characterize the genomic sequence  
396 generated as a result of the T-DNA integration, and we could observe that for 8  
397 out of 17 of the lines that contained insulator sequences, we had evidence of a  
398 lack of precision in the insertion of the RB, while that was not the case for any of  
399 the 4 control lines (Table 2). 3 out of 5 of the AtS/MAR10 lines contained vector  
400 backbone DNA (from outside the T-DNA region) integrated into the plant  
401 genome, while 3 out of 5 of the Rb7 lines, one AtS/MAR10 and one TBS line

402 showed different degrees of truncation of the inserted T-DNA in the right border  
403 region. There was no evidence of truncation in the LB for any of the lines  
404 analyzed.

405

## 406 **Discussion**

### 407 *Effect of insulators on transgene expression level and variation between lines*

408 Most previous works have reported positive evidence of the effects of insulators  
409 on transgene expression, although some works can be found in the literature  
410 that report no such effect. The experiments were, however, very diverse in  
411 terms of species (some experiments had been done in tobacco and others in  
412 Arabidopsis) and in terms of method of transformation (some performed in  
413 primary transformants after regeneration and some in floral-dipped  
414 Arabidopsis).

415 It was an important motivation for this study to compare the effects of the  
416 different insulators in the same conditions: organism, developmental stage and  
417 transformation method. Our results do in fact support most results from  
418 literature, since we detect an increase in expression for lines where LUC is  
419 flanked by any of the four insulators, and previous negative results could reflect  
420 a dependency of the function of insulators on the experiment conditions.

421 Noteworthy, the use of AtS/MAR10, that had never been tested before for  
422 insulator activity, resulted in a moderate but very consistent increase in LUC  
423 expression.

424 In our hands, neither chiMAR, Rb7 nor TBS had an effect on reducing inter-line  
425 or inter-individual variation, in fact they increased them significantly. However,  
426 previous studies on the effect of chiMAR had highlighted its effect on the  
427 reduction of expression variability among transgenic lines (Mlynarova et al.,  
428 1995, 1994). This inconsistency could derive from a few factors in which our  
429 study differs basically from these other works. First, in our system we have used  
430 the pMAS promoter (versus the p35S used by Mlynarova et al. 1994 and

431 Mlynarova et al. 1995) which never reaches such high levels of expression as  
432 the p35S, but that results in normally distributed expression levels in  
433 populations of transformants (De Bolle et al., 2003). It might be possible that the  
434 chiMAR works reducing the variance of strong promoters but its effect is not so  
435 apparent in promoters with an intrinsically low level of variation such as pMAS,  
436 like Mankin *et al.*, 2003 described for Rb7. Second, in our study we have  
437 analyzed expression in homozygous T3 lines, that are already established lines  
438 with low variance in comparison with the T1 transformants analyzed by  
439 Mlynarova et al. 1994 and Mlynarova et al. 1995. It is interesting to note that the  
440 levels of variability between lines in the LUC control are in the same range as  
441 the variability between genetically identical individuals (around 30%), supporting  
442 the consistency and small intrinsic variance of our experimental set up in which  
443 we analyze T3.

444 In fact, it is striking that AtS/MAR10 is able to diminish inter-line variance,  
445 proving efficient in modifying both of the parameters measured, increasing  
446 transgene expression and reducing variability between lines, what makes it the  
447 best performing of the insulators analyzed.

448

#### 449 *Effect of insulators on T-DNA insertion*

450 Two interesting observations have been made regarding the effect of insulators  
451 on the insertion of T-DNAs. On the one hand, it is reported that T-DNA  
452 integrations recovered by selection are mostly located in “open chromatin” or  
453 euchromatin, while, without selection, integration is biased towards regions with  
454 marks of heterochromatin (Francis and Spiker, 2005). This is explained by the  
455 silencing of the selection genes when integration takes place within  
456 heterochromatin, a phenomenon that prevents transformant recovery. Our  
457 results show the ability of chiMAR to shelter T-DNAs from heterochromatin  
458 spreading and to allow for transgene expression regardless of the position  
459 effect.

460 On the other hand, the observation of an increased frequency of truncated T-  
461 DNAs in the lines containing insulators had been reported before by Li *et al.*,



462 2008. Our results can be interpreted in the light of a role of insulators in the  
463 protection of transgenes at the right border end of the T-DNA from deletions.  
464 This would also explain the low correlation of expression between reporter  
465 genes located within the same T-DNA observed in many previous studies, and  
466 shown to improve by the use of insulators flanking them (Mlynarova et al.,  
467 1995). The preferential insertion of vector backbone in constructs harboring  
468 AtS/MAR10 cannot be explained by this rationale, though, and further  
469 experiments will be necessary to understand it.

470 As a general conclusion, we can state that there are many different insulators  
471 described in the literature with very different properties. Their functions might  
472 reflect differences in their action mechanisms and their use in transgenic  
473 constructs should depend on the needs of a specific experiment.

474

475 In our experimental setup, the best performing insulators were Rb7 in terms of  
476 increase of transgene expression, and AtS/MAR10 in terms of reducing  
477 variance.

478

479 Plant biologists should invest more efforts in the development of technologies  
480 that can render transgenes with high and stable expression with rapidity and  
481 ease. The future of synthetic biology and biotechnology projects depends on  
482 our ability to stabilize transgene expression and alleviate interference with the  
483 host genome regulation. In this work we show that the use of genetic insulators  
484 can help achieve these objectives with their simple addition at the flanks of the  
485 constructs used for transformation.

486

487

#### 488 **Acknowledgements**

489 Technical help from Cristina Vaca and Diana Coroian is greatly appreciated.

490

491

#### 492 **Author contributions**

493 AP and EC designed the experiments and analyzed the results. AP carried out  
494 the experiments. EC wrote the manuscript.



495

496

497 **Conflict of interest**

498 The authors have no conflict of interest to report.

499

500

501 **References**

502 Abranches, R., Shultz, R.W., Thompson, W.F., Allen, G.C., 2005. Matrix

503 attachment regions and regulated transcription increase and stabilize

504 transgene expression. *Plant Biotechnol. J.* 3, 535–543.

505 <https://doi.org/10.1111/j.1467-7652.2005.00144.x>

506 Allen, G.C., Hall, G., Michalowski, S., Newman, W., Spiker, S., Weissinger,

507 A.K., Thompson, W.F., 1996. High-Level Transgene Expression in Plant

508 Cells: Effects of a Strong Scaffold Attachment Region from Tobacco.

509 *Plant Cell* 8, 899–913. <https://doi.org/10.1105/tpc.8.5.899>

510 Butaye, K.M.J., Cammue, B.P.A., Delauré, S.L., De Bolle, M.F.C., 2005.

511 Approaches to minimize variation of transgene expression in plants. *Mol.*

512 *Breed.* <https://doi.org/10.1007/s11032-005-4929-9>

513 Butaye, K.M.J., Goderis, I.J.W.M., Wouters, P.F.J., Poes, J.M.-T.G., Delauré,

514 S.L., Broekaert, W.F., Depicker, A., Cammue, B.P. a, De Bolle, M.F.C.,

515 2004. Stable high-level transgene expression in *Arabidopsis thaliana* using

516 gene silencing mutants and matrix attachment regions. *Plant J.* 39, 440–9.

517 <https://doi.org/10.1111/j.1365-313X.2004.02144.x>

518 Clough, S.J., Bent, A.F., 1998. Floral dip: a simplified method for

519 *Agrobacterium*-mediated transformation of *Arabidopsis thaliana*. *Plant J.*

520 16, 735–43.

521 De Bolle, M.F.C., Butaye, K.M.J., Coucke, W.J.W., Goderis, I.J.W.M., Wouters,

522 P.F.J., van Boxel, N., Broekaert, W.F., Cammue, B.P.A., 2003. Analysis of

523 the influence of promoter elements and a matrix attachment region on the

524 inter-individual variation of transgene expression in populations of

525 *Arabidopsis thaliana*. *Plant Sci.* 165, 169–179.

526 [https://doi.org/10.1016/S0168-9452\(03\)00156-0](https://doi.org/10.1016/S0168-9452(03)00156-0)

527 De Bolle, M.F.C., Butaye, K.M.J., Goderis, I.J.W.M., Wouters, P.F.J., Jacobs,

528 A., Delauré, S.L., Depicker, A., Cammue, B.P.A., 2007. The influence of

- 529 matrix attachment regions on transgene expression in *Arabidopsis thaliana*  
530 wild type and gene silencing mutants. *Plant Mol. Biol.* 63, 533–543.  
531 <https://doi.org/10.1007/s11103-006-9107-x>
- 532 Dietz-Pfeilstetter, A., Arndt, N., Manske, U., 2016. Effects of a petunia  
533 scaffold/matrix attachment region on copy number dependency and  
534 stability of transgene expression in *Nicotiana tabacum*. *Transgenic Res.* 25,  
535 149–162. <https://doi.org/10.1007/s11248-015-9924-2>
- 536 Francis, K.E., Spiker, S., 2005. Identification of *Arabidopsis thaliana*  
537 transformants without selection reveals a high occurrence of silenced T-  
538 DNA integrations. *Plant J.* 41, 464–477. <https://doi.org/10.1111/j.1365-313X.2004.02312.x>
- 540 Hall, G., Allen, G.C., Loer, D.S., Thompson, W.F., Spiker, S., 1991. Nuclear  
541 scaffolds and scaffold-attachment regions in higher plants. *Proc. Natl.*  
542 *Acad. Sci. U. S. A.* 88, 9320–4.
- 543 Hetzl, J., Foerster, A.M., Raidl, G., Scheid, O.M., 2007. CyMATE: A new tool for  
544 methylation analysis of plant genomic DNA after bisulphite sequencing.  
545 *Plant J.* <https://doi.org/10.1111/j.1365-313X.2007.03152.x>
- 546 Hily, J.M., Singer, S.D., Yang, Y., Liu, Z., 2009. A transformation booster  
547 sequence (TBS) from *Petunia hybrida* functions as an enhancer-blocking  
548 insulator in *Arabidopsis thaliana*. *Plant Cell Rep.* 28, 1095–1104.  
549 <https://doi.org/10.1007/s00299-009-0700-8>
- 550 Kearse, M., Moir, R., Wilson, A., Stones-Havas, S., Cheung, M., Sturrock, S.,  
551 Buxton, S., Cooper, A., Markowitz, S., Duran, C., Thierer, T., Ashton, B.,  
552 Meintjes, P., Drummond, A., 2012. Geneious Basic: An integrated and  
553 extendable desktop software platform for the organization and analysis of  
554 sequence data. *Bioinformatics.*  
555 <https://doi.org/10.1093/bioinformatics/bts199>
- 556 Li, J., Brunner, A.M., Meilan, R., Strauss, S.H., 2008. Matrix attachment region  
557 elements have small and variable effects on transgene expression and  
558 stability in field-grown *Populus*. *Plant Biotechnol. J.* 6, 887–896.  
559 <https://doi.org/10.1111/j.1467-7652.2008.00369.x>
- 560 Loc, P. V., Strätling, W.H., 1988. The matrix attachment regions of the chicken  
561 lysozyme gene co-map with the boundaries of the chromatin domain.  
562 *EMBO J.* 7, 655–64.

- 563 Mankin, S.L., Allen, G.C., Phelan, T., Spiker, S., Thompson, W.F., 2003.  
564 Elevation of Transgene Expression Level by Flanking Matrix Attachment  
565 Regions (MAR) is Promoter Dependent: A Study of the Interactions of Six  
566 Promoters with the RB7 3' MAR. *Transgenic Res.* 12, 3–12.  
567 <https://doi.org/10.1023/A:1022194120518>
- 568 Matzat, L.H., Lei, E.P., 2014. Surviving an identity crisis: a revised view of  
569 chromatin insulators in the genomics era. *Biochim. Biophys. Acta* 1839,  
570 203–14. <https://doi.org/10.1016/j.bbagr.2013.10.007>
- 571 Mlynarova, L., Jansen, R.C., Conner, A.J., Stiekema, W.J., Nap, J.P., 1995.  
572 The MAR-Mediated Reduction in Position Effect Can Be Uncoupled from  
573 Copy Number-Dependent Expression in Transgenic Plants. *PLANT CELL*  
574 *ONLINE* 7, 599–609. <https://doi.org/10.1105/tpc.7.5.599>
- 575 Mlynarova, L., Loonen, A., Heldens, J., Jansen, R.C., Keizer, P., Stiekema,  
576 W.J., Nap, J.P., 1994. Reduced Position Effect in Mature Transgenic Plants  
577 Conferred by the Chicken Lysozyme Matrix-Associated Region. *PLANT*  
578 *CELL ONLINE* 6, 417–426. <https://doi.org/10.1105/tpc.6.3.417>
- 579 Murashige, T., Skoog, F., 1962. A Revised Medium for Rapid Growth and Bio  
580 Assays with Tobacco Tissue Cultures. *Physiol. Plant.* 15, 473–497.  
581 <https://doi.org/10.1111/j.1399-3054.1962.tb08052.x>
- 582 Pascuzzi, P.E., Flores-Vergara, M.A., Lee, T.-J., Sosinski, B., Vaughn, M.W.,  
583 Hanley-Bowdoin, L., Thompson, W.F., Allen, G.C., 2014. In vivo mapping  
584 of arabidopsis scaffold/matrix attachment regions reveals link to  
585 nucleosome-disfavoring poly(dA:dT) tracts. *Plant Cell* 26, 102–20.  
586 <https://doi.org/10.1105/tpc.113.121194>
- 587 Pérez-González, A., Caro, E., 2016. Hindrances to the Efficient and Stable  
588 Expression of Transgenes in Plant Synthetic Biology Approaches, in:  
589 Systems Biology Application in Synthetic Biology. Springer India, New  
590 Delhi, pp. 79–89. [https://doi.org/10.1007/978-81-322-2809-7\\_7](https://doi.org/10.1007/978-81-322-2809-7_7)
- 591 Sequeira-Mendes, J., Araguez, I., Peiro, R., Mendez-Giraldez, R., Zhang, X.,  
592 Jacobsen, S.E., Bastolla, U., Gutierrez, C., 2014. The Functional  
593 Topography of the Arabidopsis Genome Is Organized in a Reduced  
594 Number of Linear Motifs of Chromatin States. *Plant Cell* 26, 2351–2366.  
595 <https://doi.org/10.1105/tpc.114.124578>
- 596 Singer, S.D., Hily, J.M., Cox, K.D., 2011. Analysis of the enhancer-blocking

597 function of the TBS element from *Petunia hybrida* in transgenic *Arabidopsis*  
598 *thaliana* and *Nicotiana tabacum*. *Plant Cell Rep.* 30, 2013–2025.  
599 <https://doi.org/10.1007/s00299-011-1109-8>  
600 Stief, A., Winter, D.M., Strätling, W.H., Sippel, A.E., 1989. A nuclear DNA  
601 attachment element mediates elevated and position-independent gene  
602 activity. *Nature* 341, 343–345. <https://doi.org/10.1038/341343a0>  
603 Weber, E., Engler, C., Gruetzner, R., Werner, S., Marillonnet, S., 2011. A  
604 Modular Cloning System for Standardized Assembly of Multigene  
605 Constructs. *PLoS One* 6, e16765.  
606 <https://doi.org/10.1371/journal.pone.0016765>  
607  
608

609 **Figure legends:**

610

611 **Figure 1. Analysis of insulator effect over LUC activity**

612 A) Schematic representation of the constructs used for studying the effect  
613 genomic insulators flanking transgenes. The above scheme represents the  
614 construction used as a control (LUC) while the scheme below represents the  
615 four constructions flanked by the four different insulators. *pMAS*: mannopine  
616 synthase gene promoter; LUC: firefly luciferase; Tnos: nopaline synthase  
617 terminator; *pNos*: nopaline synthase promoter; Tocs: octopine synthase  
618 terminator. “Insulator” represents Rb7, chiMAR, TBS or AtS/MAR10.

619 B) Time course of LUC activity when expressed under the *pMAS* promoter.  
620 Lines were assayed for LUC imaging at 12, 22 and 28 days-old. Results for  
621 control line LUC 14.9 (indicated with an arrow) are shown, but similar data was  
622 obtained for the rest of the lines. d.o.s: day-old seedlings; cps: counts per  
623 second.

624 C) Box plots showing LUC activity. \*\* represents Student’s test significant  
625 differences ( $p < 0.005$ ); \*\*\* represents Student’s test highly significant differences  
626 ( $p < 0.001$ ); cps: counts per second.

627 D) LUC activity imaging of the T3 homozygous lines, eight lines per  
628 construction.

629

630 **Figure 2. Analysis of insulator effect over inter-line, inter-individual and**  
631 **inter-generation variation of LUC activity.**

632 A) Scattergrams showing LUC activity in the selected eight lines obtained after  
633 transformation with each construct. The CV of each population was calculated  
634 as (standard deviation/mean)\*100.

635 B) Comparison of the inter-line coefficient of variation. \*\* represents Student's  
636 test significant differences ( $p < 0.005$ ); \*\*\* represents Student's test highly  
637 significant differences ( $p < 0.001$ ); CV: coefficient of variation; cps: counts per  
638 second.

639 C) Scattergrams showing LUC activity in 16 seedlings of the eight selected lines  
640 obtained after transformation with each construct. CV was determined for each  
641 line and calculated as (standard deviation/mean)\*100. cps/cm<sup>2</sup>: counts per  
642 second/cm<sup>2</sup>. The arrow in the AtS/MAR10 graph represents the outlier line.

643 D) Comparison of the inter-individual coefficients of variation. CV for each  
644 insulator was calculated as (standard deviation/mean)\*100. A great variance  
645 was overserved for the insulated lines compared to the control except for  
646 AtS/MAR10, that showed a small variation similar to the control, in agreement  
647 with the Student's test. \*\*\*represents highly significant differences ( $p < 0.001$ ).

648 E) Box plots showing LUC activity in T2 and T3 generations of the 8 selected  
649 lines obtained after transformation eighth each construct. cps: counts per  
650 second.

651

652 **Figure 3. Analysis of insulator effect over T-DNA insertion**

653 A) Scheme of the WGR pipeline

654 B) Representation of the T-DNA insertion sites mapped within the five  
655 Arabidopsis chromosomes.

656 C) Graph showing LUC activity versus chromatin state (Sequeira-Mendes et al.,  
657 2014) at T-DNA integration site. cps: counts per second.

658

659 **Figure 4. Analysis of the DNA methylation levels in the junction between**  
660 **the host genome and the T-DNA for line chiMAR 6.13**

661 Upper part: schematic representation of the junction site. Middle part: graphical  
662 output of the methylation analysis (CyMate software) in 12 day-old seedlings of  
663 chiMARs 6.13 line. Red circles represent CG sites, blue squares represent

664 CHG sites and green triangles represent CHH sites. Filled symbols indicate  
665 methylated cytosines while empty ones represent non methylated cytosines.  
666 Lower part: the graph shows the DNA methylation quantification of CG (red  
667 bars), CHG (blue bars) and CHH (green bars) cytosine contexts for the flanking  
668 sequence (left) and the T-DNA (right).

669

670 **Table 1. Details of the T-DNA insertions for single-copy lines based on**  
671 **WGR results.**

672

673 **Table 2. Characterization of the genomic sequences generated as a result**  
674 **of the T-DNA integrations.**

675

676 **Supplementary files 1: WGR data at the 21 mapped single insertion sites.**



A

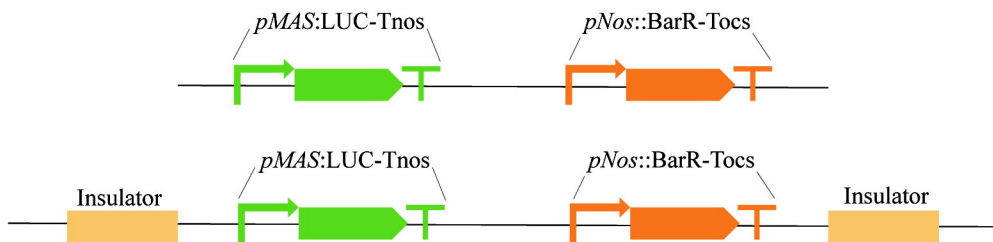

B

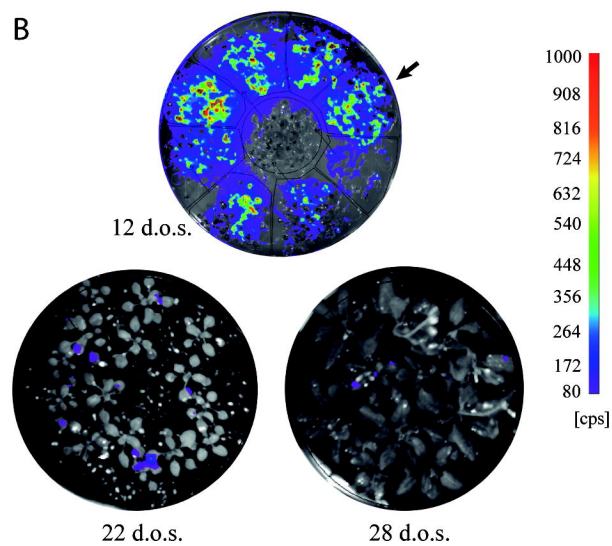

C

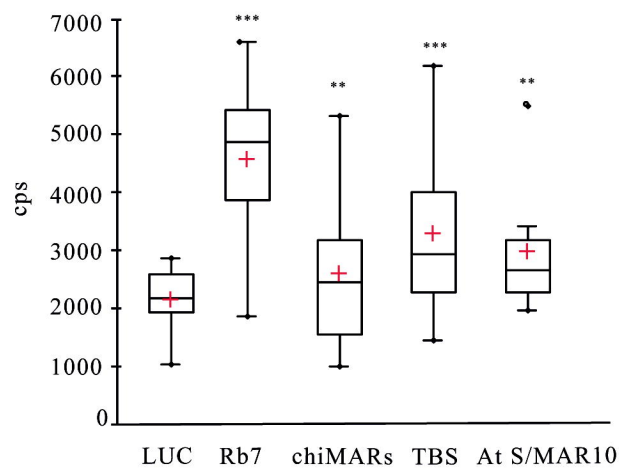

D

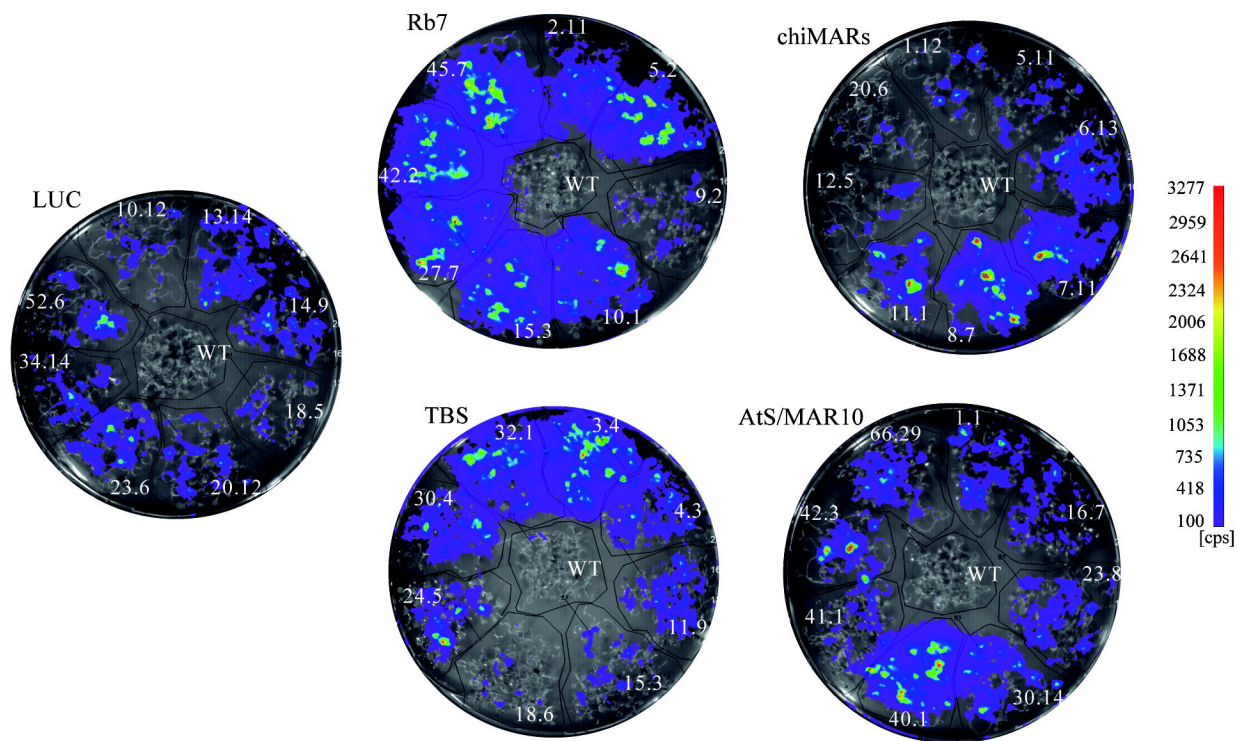

A

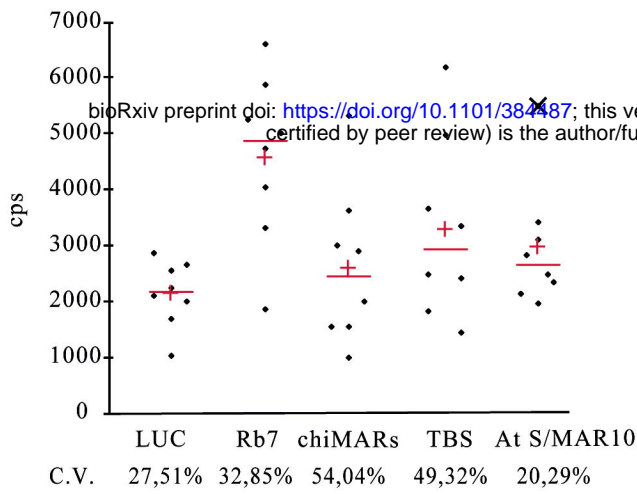

B

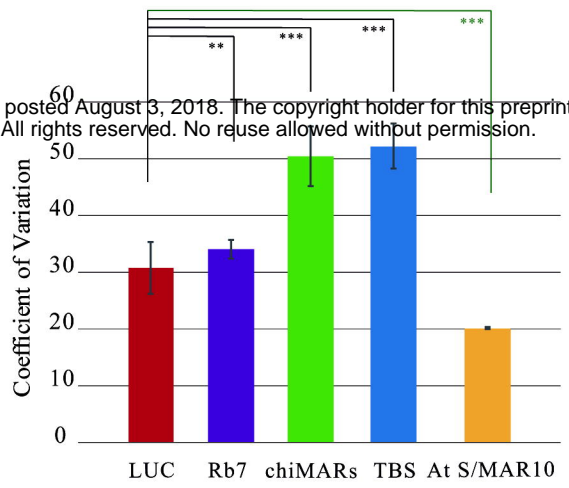

C

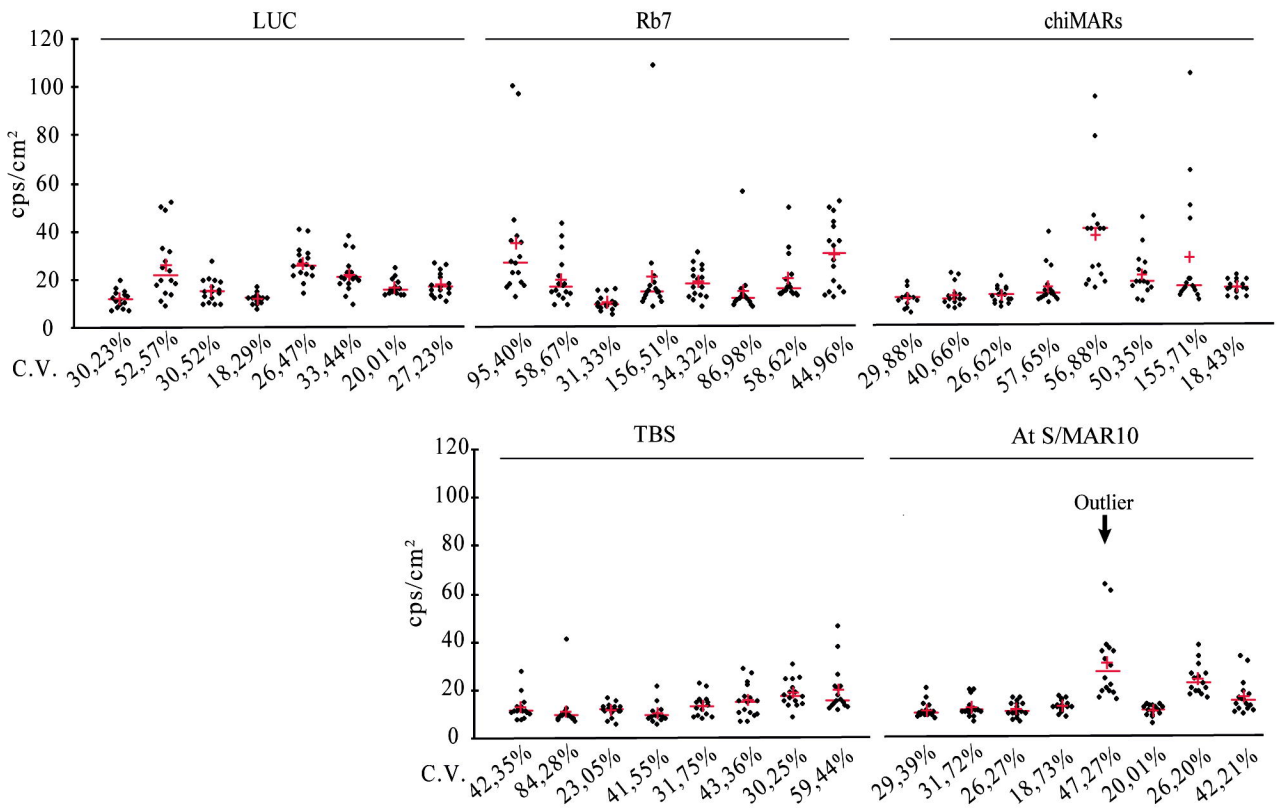

D

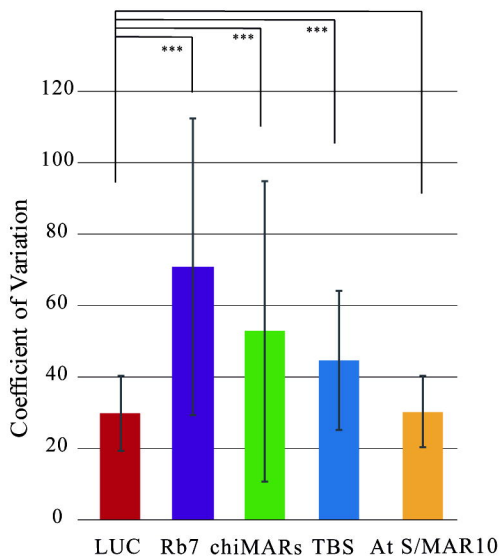

E

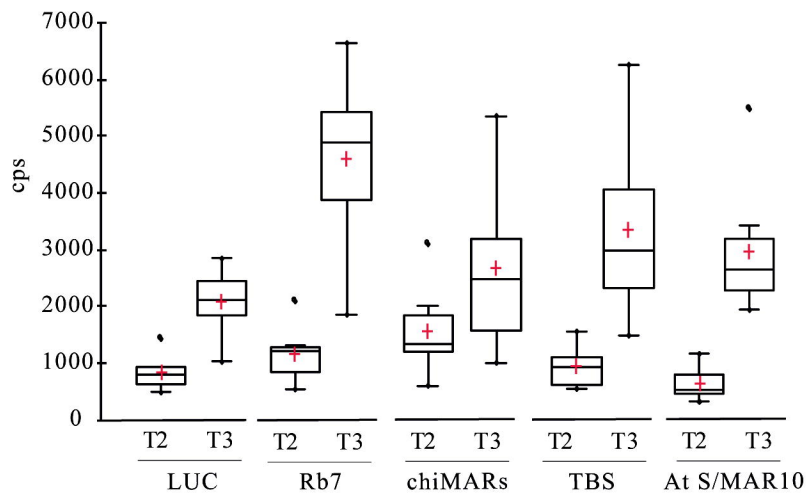



A

gDNA extraction from 10 day-old seedlings → Shearing into short fragments (over 350bp) & Ligation with adapters

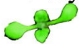

bioRxiv preprint doi: <https://doi.org/10.1101/384487>; this version posted August 3, 2018. The copyright holder for this preprint (which was not certified by peer review) is the author/funder. All rights reserved. No reuse allowed without permission.

Amplification & Library construction → Pair-end sequencing (Illumina platform)

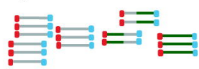

→ Bioinformatics analysis

→ Cleaning of raw data

→ Alignment to reference genome (TAIR 10)

→ T-DNA integration detection

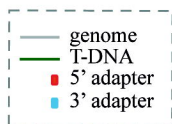

B

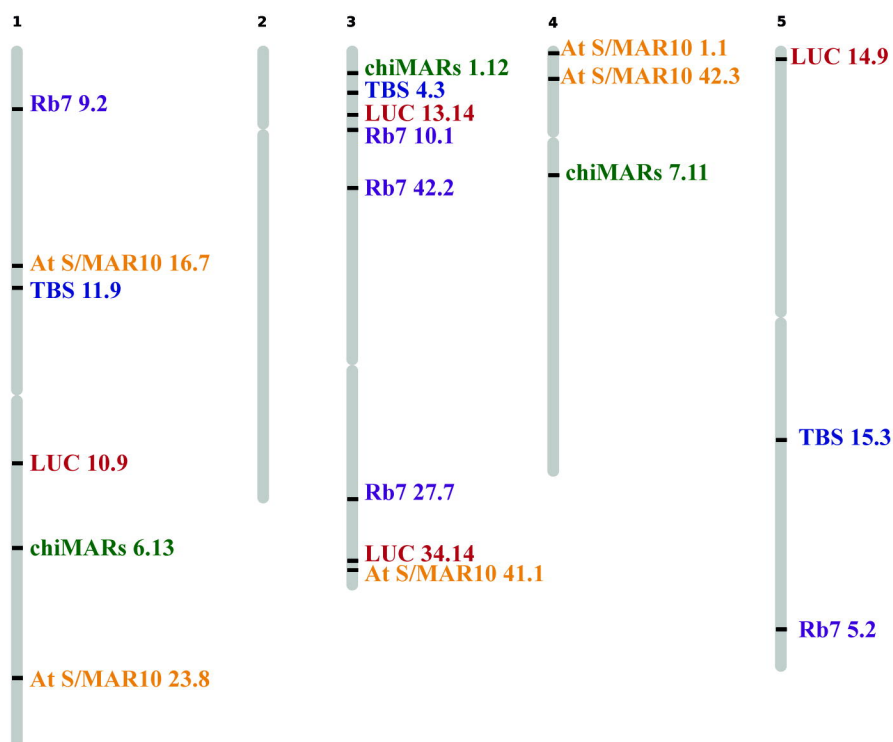

C

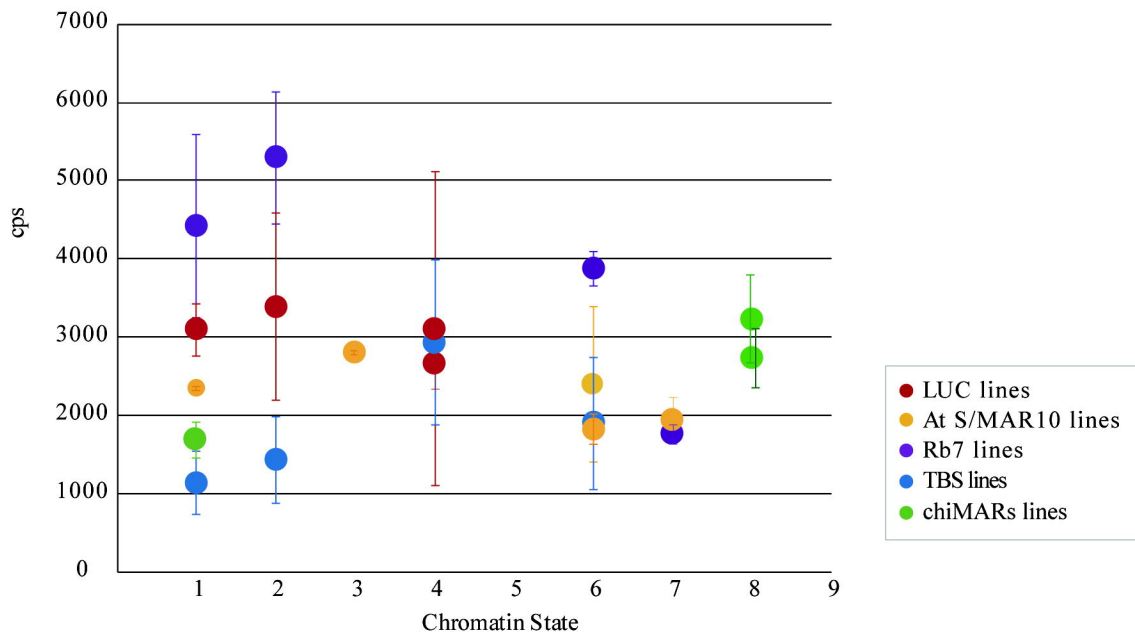

*A. thaliana*  
Chromosome 1

T-DNA

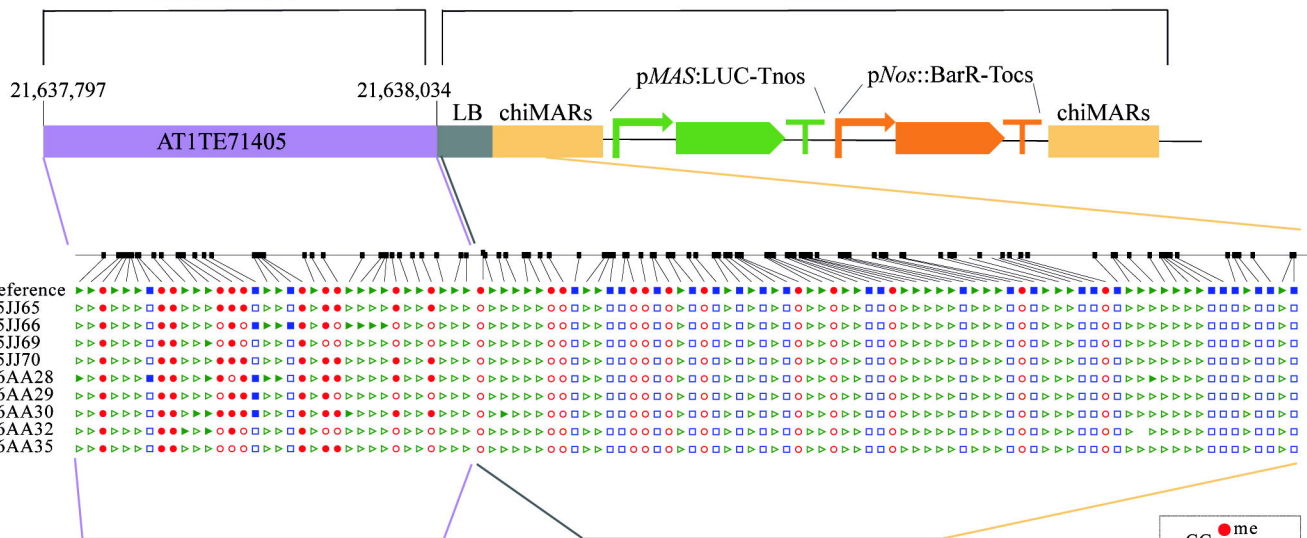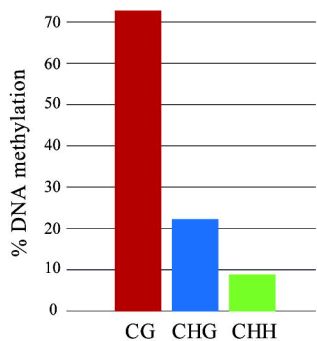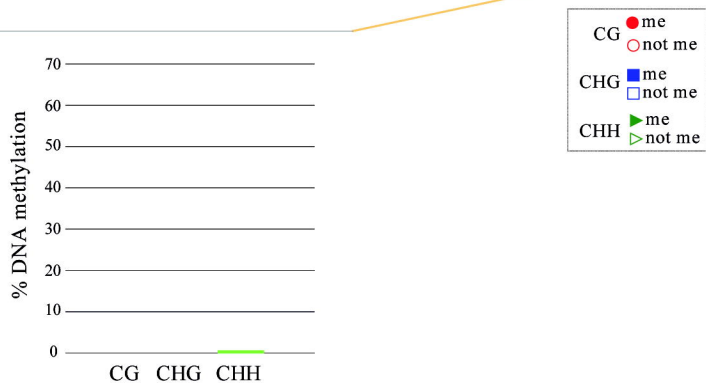

| <b>Line</b>     | <b>Chromosome</b> | <b>Insertion site<br/>(coordinates<br/>TAIR10)</b> | <b>T-DNA<br/>direction</b> | <b>Deletion of host<br/>genome at insertion<br/>site</b> | <b>Chromatin State<br/>(Sequeira-Mendes<br/>et al., 2014)</b> | <b>Additional<br/>File</b> |
|-----------------|-------------------|----------------------------------------------------|----------------------------|----------------------------------------------------------|---------------------------------------------------------------|----------------------------|
| LUC 1009        | 1                 | 17,979,345                                         | 3' → 5'                    | 3bp                                                      | 1                                                             | Sup.Fig.1.1                |
| LUC 1314        | 3                 | 2,976,299                                          | 5' → 3'                    | 63bp                                                     | 3                                                             | Sup.Fig.1.2                |
| LUC 1409        | 5                 | 561,006                                            | 5' → 3'                    | 0bp                                                      | 5                                                             | Sup.Fig.1.3                |
| LUC 3414        | 3                 | 22,164,245                                         | 5' → 3'                    | 35bp                                                     | 3                                                             | Sup.Fig.1.4                |
|                 |                   |                                                    |                            |                                                          |                                                               |                            |
| At S/MAR10 0101 | 4                 | 317,714                                            | 5' → 3'                    | 2bp                                                      | 7                                                             | Sup.Fig.1.5                |
| At S/MAR10 1607 | 1                 | 9,473,679                                          | 5' → 3'                    | 4256bp                                                   | 6                                                             | Sup.Fig.1.6                |
| At S/MAR10 2308 | 1                 | 27,233,367                                         | 3' → 5'                    | 12bp                                                     | 1                                                             | Sup.Fig.1.7                |
| At S/MAR10 4101 | 3                 | 22,571,686                                         | 5' → 3'                    | 15bp                                                     | 6                                                             | Sup.Fig.1.8                |
| At S/MAR10 4203 | 4                 | 1,427,639                                          | 5' → 3'                    | 26bp                                                     | 3                                                             | Sup.Fig.1.9                |
|                 |                   |                                                    |                            |                                                          |                                                               |                            |
| Rb7 0502        | 5                 | 25,137,027                                         | 3' → 5'                    | 48bp                                                     | 1                                                             | Sup.Fig.1.10               |
| Rb7 0902        | 1                 | 2,741,409                                          | 3' → 5'                    | 14bp                                                     | 7                                                             | Sup.Fig.1.11               |
| Rb7 1001        | 3                 | 3,646,853                                          | 3' → 5'                    | 26bp                                                     | 6                                                             | Sup.Fig.1.12               |
| Rb7 2707        | 3                 | 19,513,996                                         | 3' → 5'                    | 91bp                                                     | 2                                                             | Sup.Fig.1.13               |
| Rb7 4202        | 3                 | 6,147,763                                          | 3' → 5'                    | 34bp                                                     | 2                                                             | Sup.Fig.1.14               |
|                 |                   |                                                    |                            |                                                          |                                                               |                            |
| TBS 0403        | 3                 | 1,999,288                                          | 5' → 3'                    | 2bp                                                      | 4                                                             | Sup.Fig.1.15               |
| TBS 1109        | 1                 | 10,441,945                                         | 5' → 3'                    | 30bp                                                     | 6                                                             | Sup.Fig.1.16               |
| TBS 1503        | 5                 | 16,979,834                                         | 3' → 5'                    | 27bp                                                     | 2                                                             | Sup.Fig.1.17               |
| TBS 1806        | 1                 | 30,225,399                                         | 3' → 5'                    | 21bp                                                     | 1                                                             | Sup.Fig.1.18               |
|                 |                   |                                                    |                            |                                                          |                                                               |                            |
| chiMARs 0112    | 3                 | 1,192,380                                          | 5' → 3'                    | 96bp                                                     | 1                                                             | Sup.Fig.1.19               |
| chiMARs 0613    | 1                 | 21,638,034                                         | 5' → 3'                    | 11bp                                                     | 8                                                             | Sup.Fig.1.20               |
| chiMARs 0711    | 4                 | 5,558,851                                          | 3' → 5'                    | 1bp                                                      | 8                                                             | Sup.Fig.1.21               |

| Line            | Chromosome | Insertion site (coordinates TAIR10) | T-DNA direction | T-DNA 5' insertion site | T-DNA 3' insertion site |
|-----------------|------------|-------------------------------------|-----------------|-------------------------|-------------------------|
| At S/MAR10 0101 | 4          | 317,714                             | 5' → 3'         | -35 (LB)                | -959 (Tocs)             |
| At S/MAR10 1607 | 1          | 9,473,679                           | 5' → 3'         | 0 (LB)                  | +3746 (RK2 TrfA)        |
| At S/MAR10 4101 | 3          | 22,571,686                          | 5' → 3'         | -21 (LB)                | +3825 (RK2 TrfA)        |
| At S/MAR10 4203 | 4          | 1,427,639                           | 5' → 3'         | -17 (LB)                | +1788 (pUC ori)         |
| Rb7 0902        | 1          | 2,741,409                           | 3' → 5'         | -19 (LB)                | -370 (Rb7)              |
| Rb7 2707        | 3          | 19,513,996                          | 3' → 5'         | 0 (LB)                  | -515 (Rb7)              |
| Rb7 4202        | 3          | 6,147,763                           | 3' → 5'         | -21 (LB)                | -1052 (Rb7)             |
| TBS 1503        | 5          | 16,979,834                          | 3' → 5'         | -5 (LB)                 | -2454 (Tocs)            |

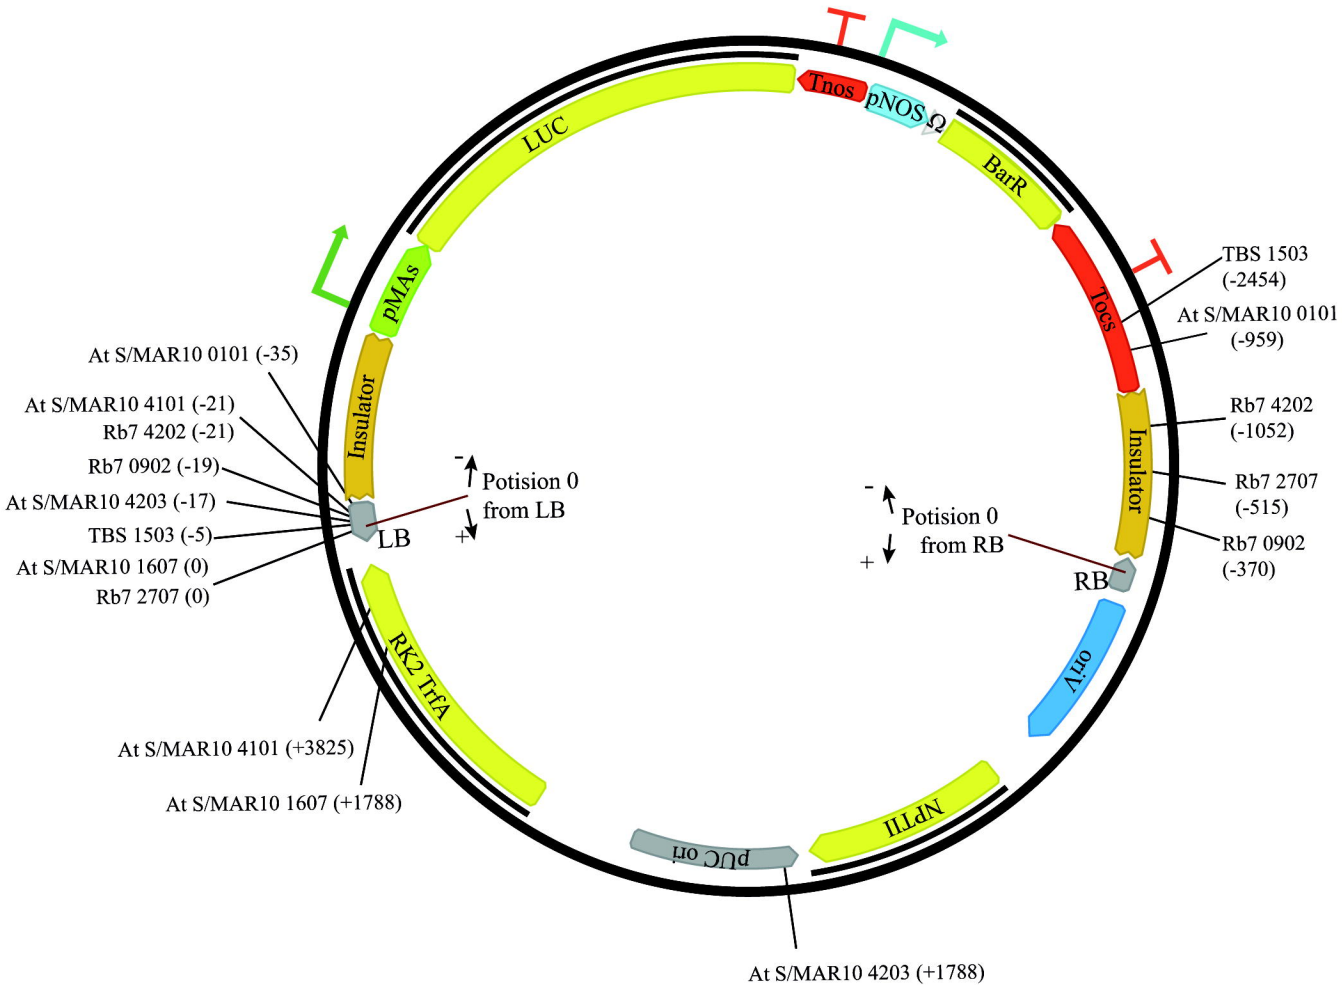

Source: https://www.biorxiv.org/content/10.1101/384487v1.full.pdf
